# Supplementary material for: Determination of lead levels in maternal and umbilical cord blood at birth at the Lagos University Teaching Hospital, Lagos
Source: PubMed Central journal article supplement (PMC6366766; doi:10.1371/journal.pone.0211535), 2019-02-07
Supplement: pone.0211535.s002.pdf [file pone.0211535.s002.pdf]

# LAGOS UNIVERSITY TEACHING HOSPITAL HEALTH RESEARCH AND ETHICS COMMITTEE

PRIVATE MAIL BAG 12003, LAGOS, NIGERIA.  
e-mail address: luthethics@yahoo.com

**Chairman**  
ASSOC. PROF. N.U. OKUBADEJO  
MB. ChB, FMCP

**Administrative Secretary**  
MR. D.J. AKPAN  
B.Sc. BUS. ADMIN, MIHSAN

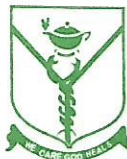

**Chief Medical Director:**  
PROF. AKIN. OSIBOGUN  
MBBS (Lagos), MPH (Columbia), FMCPH FWACP

**Chairman, Medical Advisory Committee**  
PROF. CHRIS BODE FMCS (Nig.) FWACS.

LUTH HREC REGISTRATION NUMBER: NHREC: 19/12/2008a  
Office Address: Room 107, 1st floor, LUTH Administrative Block  
Telephone: 234-1-5850737, 5852187, 5852209, 5852158, 5852111

5th August, 2014

## NOTICE OF EXPEDITED REVIEW AND APPROVAL

**PROJECT TITLE: "DETERMINATION OF LEAD LEVELS IN MATERNAL AND UMBILICAL CORD BLOOD AT BIRTH AT THE LAGOS UNIVERSITY TEACHING HOSPITAL, LAGOS".**

**HEALTH RESEARCH COMMITTEE ASSIGNED NO.: ADM/DCST/HREC/1910**

**NAME OF PRINCIPAL INVESTIGATOR: DR. LADELE JEJELOLA IBUKUNOLUWAPO**

**ADDRESS OF PRINCIPAL INVESTIGATOR: DEPT. OF PAEDIATRICS, LUTH.**

**DATE OF RECEIPT OF VALID APPLICATION: 23-06-14**

This is to inform you that the research described in the submitted protocol, the consent forms, and all other related materials where relevant have been reviewed and given full approval by the Lagos University Teaching Hospital Health Research Ethics Committee (LUTHHREC).

This approval dates from 05-08-2014 to 05-08-2015. If there is delay in starting the research, please inform the HREC so that the dates of approval can be adjusted accordingly. Note that no participant accrual or activity related to this research may be conducted outside of this dates. All informed consent forms used in this study must carry the HREC assigned number and duration of HREC approval of the study. In multiyear research, endeavor to submit your annual report to the HREC early in order to obtain renewal of your approval and avoid disruption of your research.

The National code for Health Research Ethics requires you to comply with all institutional guidelines, rules and regulations and with the tenets of the code including ensuring that all adverse events are reported promptly to the HREC. No changes are permitted in the research without prior approval by the HREC except in circumstances outlined in the code. The HREC reserves the right to conduct compliance visits to your research site without previous notification.

**CHAIRMAN**  
**DR. N. U. OKUBADEJO**  
**CHAIRMAN, LUTH HEALTH RESEARCH ETHICS COMMITTEE**
